# Supplementary material for: Visible-light-driven TiO2/Ag3PO4 heterostructures with enhanced antifungal activity against agricultural pathogenic fungi Fusarium graminearum and mechanism insight
Source: Royal Society of Chemistry journal article supplement (doi:10.1039/c6en00415f), 2016-11-21
Supplement: c6en00415f1.pdf [file c6en00415f1.pdf]

**Visible-light-driven TiO<sub>2</sub>/Ag<sub>3</sub>PO<sub>4</sub> heterostructure with enhanced antifungal activity against agricultural pathogenic fungi *Fusarium graminearum* and mechanism insight**

Bingkun Liu <sup>a,\*</sup>, Yongfei Xue <sup>a</sup>, Jingtao Zhang <sup>b</sup>, Bing Han <sup>a</sup>, Jie Zhang <sup>a</sup>, Xinying Suo<sup>b</sup>, Lilong Mu <sup>a</sup> and Hengzhen Shi <sup>a,\*</sup>

<sup>a</sup> School of Material and Chemical Engineering, Zhengzhou University of Light Industry, Zhengzhou 450002, People's Republic of China.

<sup>b</sup> School of Food and Bioengineering, Zhengzhou University of Light Industry, Zhengzhou 450002, People's Republic of China.

\*Corresponding author: liubk2015@zzuli.edu.cn and shihz@zzuli.edu.cn

**SEM Observation**

Spores without or with photocatalytic treatment were collected by centrifugation. The pellet was fixed with 2.5% glutaraldehyde and 4% paraformaldehyde in 0.1 M phosphate buffer at 4 °C for 2 h. After fixation, the cell pellets were washed with phosphate buffer for three times to remove the excess fixative. Then, the samples were dehydrated by a successive soaking in 50%, 70%, and 90% ethanol for 10 min each and three soakings in absolute ethyl alcohol for 15 min each. The pellets were then soaked in isoamyl acetate for 1h. Critical point drying was performed by placing samples in hexamethyl disilazane for 45 min and allowing them to dry overnight at room temperature.

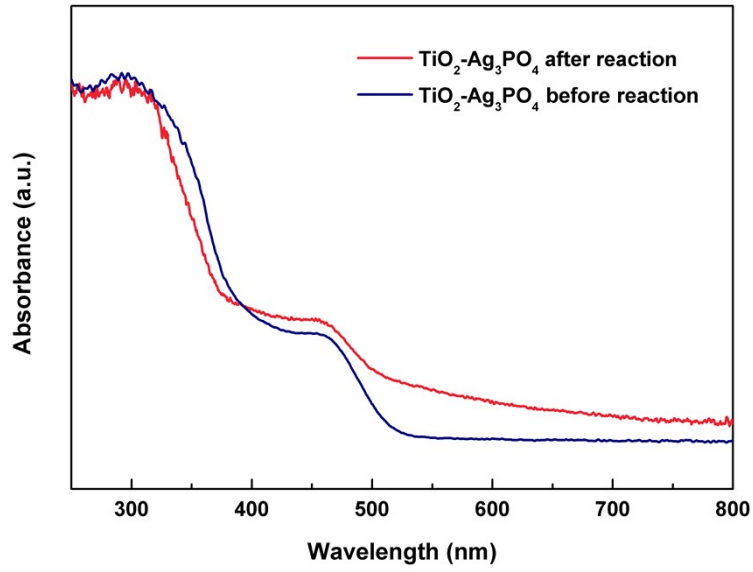

Fig. S1 UV-vis absorption spectra of  $\text{TiO}_2/\text{Ag}_3\text{PO}_4$  composite before after recycling experiments.

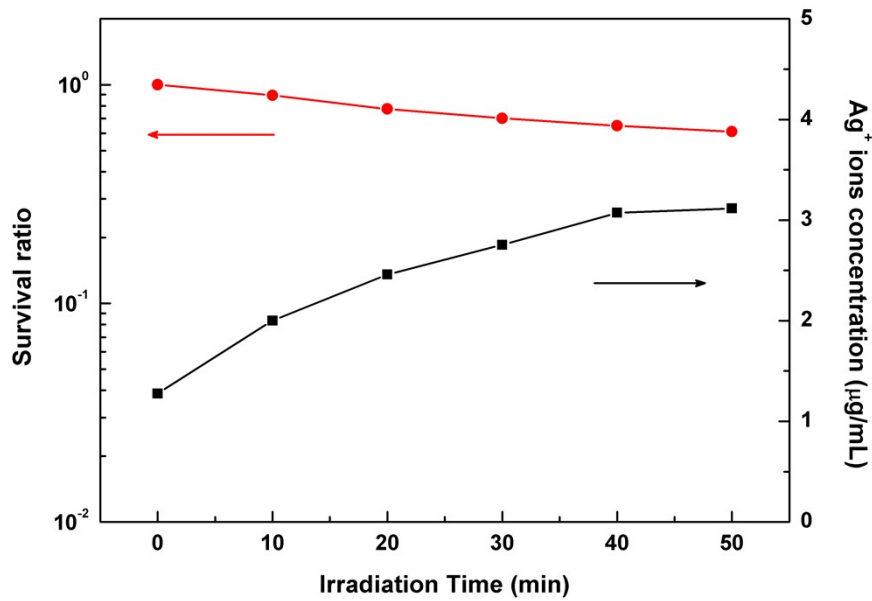

Fig. S2  $\text{Ag}^+$  ions release into mixture of *E. coli* cells and  $\text{TiO}_2/\text{Ag}_3\text{PO}_4$  composite; and inactivation curves with released  $\text{Ag}^+$  ions.

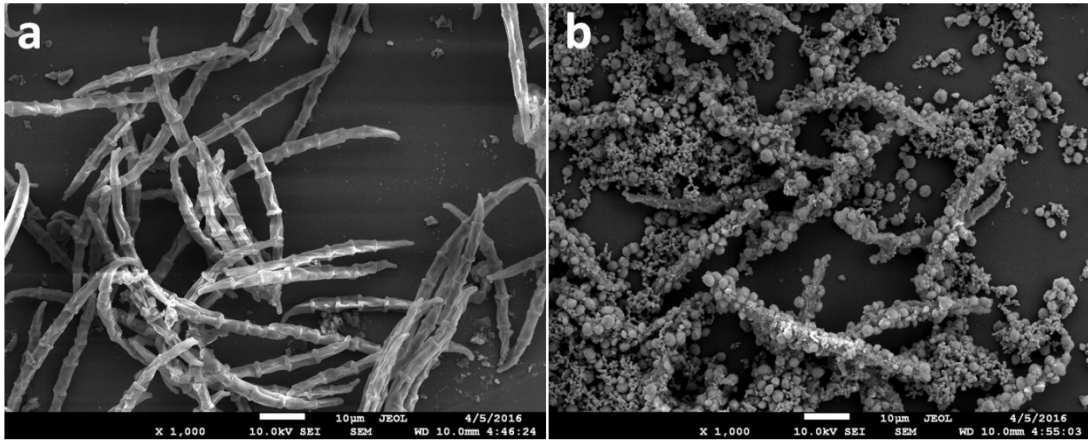

**Fig. S3** SEM images of *F. graminearum* macroconidia (a) before and (b) after photocatalytic inactivation treatment for 100 min.
